# Supplementary material
Source: PubMed Central journal article supplement (PMC2853905)
Supplement: es902413k_si_001.pdf [file es902413k_si_001.pdf]

Supporting Material for  
**Inadvertent polychlorinated biphenyls in commercial paint pigments**

*Dingfei Hu and Keri C. Hornbuckle\**

Department of Civil & Environmental Engineering, IIHR-Hydroscience and Engineering,  
The University of Iowa, Iowa City, IA 52242, USA.

\* Author to whom correspondence should be sent  
Email: [keri-hornbuckle@uiowa.edu](mailto:keri-hornbuckle@uiowa.edu) phone: (319)384-0789 Fax: 319.335.5660

Three tables are included as supplementary information (6 pages including cover page).

**Table S1. Detected PCB congeners (ng/g f.w.) in paint pigments purchased from Sherwin Williams**

|                            | <b>Y1</b>  | <b>G2</b>   | <b>R4</b>   | <b>L1</b>  | <b>W1</b> | <b>N1</b> | <b>Y3</b> | <b>R2</b> | <b>R3</b> | <b>B1</b> |
|----------------------------|------------|-------------|-------------|------------|-----------|-----------|-----------|-----------|-----------|-----------|
| 1 mono                     | 0.08       | 0.20        | 0.11        | 0.45       | 0         | 0         | 0         | 0         | 0         | 0         |
| 2 mono                     | 0.02       | 0.12        | 0.19        | 0.14       | 0         | 0         | 0         | 0         | 0         | 0         |
| 3 mono                     | 0.32       | 0.11        | 0.67        | 0.12       | 0         | 0         | 0         | 0         | 0         | 0         |
| 4 di                       | 3.29       | 3.90        | 0.83        | 0          | 0         | 0         | 0         | 0         | 0         | 0         |
| 6 di                       | 0.81       | 11.61       | 0.32        | 0          | 0         | 0         | 0         | 0         | 0         | 0         |
| 7 di                       | 0          | 0           | 0           | 0.63       | 0         | 0         | 0         | 0         | 0         | 0         |
| 8 di                       | 2.61       | 5.61        | 3.23        | 0          | 0         | 0         | 0         | 0         | 0         | 0         |
| 11 di                      | 1.00       | 3.33        | 0.13        | 0          | 0         | 0         | 0         | 0         | 0         | 0         |
| 12 di*13                   | 0.03       | 3.73        | 3.39        | 0          | 0         | 0         | 0         | 0         | 0         | 0         |
| 15 di                      | 0          | 0.90        | 3.40        | 0          | 0         | 0         | 0         | 0         | 0         | 0         |
| 52 tetra                   | 0.35       | 0.08        | 0           | 0          | 0         | 0         | 0         | 0         | 0         | 0         |
| 61 tetra*70,74,76          | 0          | 0.22        | 0           | 0          | 0         | 0         | 0         | 0         | 0         | 0         |
| 66 tetra                   | 0          | 0.13        | 0           | 0          | 0         | 0         | 0         | 0         | 0         | 0         |
| 86 penta*87,97,109,119,125 | 0          | 0.45        | 0           | 0          | 0         | 0         | 0         | 0         | 0         | 0         |
| 90 penta*101,113           | 0.20       | 0.10        | 0           | 0          | 0         | 0         | 0         | 0         | 0         | 0         |
| 95 penta                   | 0.18       | 0           | 0           | 0          | 0         | 0         | 0         | 0         | 0         | 0         |
| 106 penta                  | 0          | 0.15        | 0           | 0          | 0         | 0         | 0         | 0         | 0         | 0         |
| 129 hexa*138,163           | 0          | 0.03        | 0           | 0          | 0         | 0         | 0         | 0         | 0         | 0         |
| 142 hexa                   | 0          | 0.59        | 0           | 0          | 0         | 0         | 0         | 0         | 0         | 0         |
| 160 hexa                   | 0          | 0.19        | 0           | 0          | 0         | 0         | 0         | 0         | 0         | 0         |
| 206 nona                   | 0          | 0.33        | 0           | 0.13       | 0         | 0         | 0         | 0         | 0         | 0         |
| 207 nona                   | 0          | 0.31        | 0           | 0          | 0         | 0         | 0         | 0         | 0         | 0         |
| 208 nona                   | 0          | 0.26        | 0           | 0.05       | 0         | 0         | 0         | 0         | 0         | 0         |
| 209 deca                   | 0          | 61.50       | 0           | 0.59       | 0         | 0         | 0         | 0         | 0         | 0         |
| <b>Sum</b>                 | <b>8.9</b> | <b>93.8</b> | <b>12.2</b> | <b>2.1</b> | <b>0</b>  | <b>0</b>  | <b>0</b>  | <b>0</b>  | <b>0</b>  | <b>0</b>  |

**Table S2. Detected PCB congeners (ng/g f.w.) in paint pigments purchased from PPG Pittsburgh**

|                            | 96-5E | 96-4D | 96-13M | 96-10J | 96-26Z | 96-7G | 96-6F | 96-12L | 96-23W | 96-2B | 96-3C | 96-22V |
|----------------------------|-------|-------|--------|--------|--------|-------|-------|--------|--------|-------|-------|--------|
| 1 mono                     | 0.25  | 0.65  | 0      | 0      | 0      | 0     | 0     | 0      | 0      | 0     | 0     | 0      |
| 2 mono                     | 0     | 0.37  | 0      | 0      | 0      | 0     | 0     | 0      | 0      | 0     | 0     | 0      |
| 3 mono                     | 0     | 0.20  | 0      | 0      | 0      | 0     | 0     | 0      | 0      | 0     | 0     | 0      |
| 4 di                       | 0     | 13.36 | 0      | 0      | 0.41   | 6.14  | 0     | 0      | 0      | 0     | 0     | 0      |
| 5 di                       | 32.05 | 0     | 0      | 3.54   | 0      | 0     | 0     | 0      | 0      | 0     | 0     | 0      |
| 6 di                       | 0     | 45.06 | 0      | 0      | 0.16   | 2.92  | 0     | 0      | 0      | 0     | 0     | 0      |
| 8 di                       | 0     | 17.83 | 0.11   | 0      | 0.50   | 4.53  | 0     | 0      | 0      | 0     | 0     | 0      |
| 9 di                       | 0.38  | 0     | 0      | 0      | 0      | 0     | 0     | 0      | 0      | 0     | 0     | 0      |
| 11 di                      | 0     | 16.38 | 0.08   | 0.12   | 1.74   | 0.80  | 0     | 0      | 0      | 0     | 0     | 0      |
| 12 di*13                   | 17.25 | 18.23 | 0.71   | 1.38   | 0      | 0     | 0     | 0      | 0      | 0     | 0     | 0      |
| 15 di                      | 0     | 4.56  | 1.18   | 0      | 0      | 0     | 0     | 0      | 0      | 0     | 0     | 0      |
| 16 tri                     | 0     | 0     | 0      | 0.50   | 0      | 0     | 0     | 0      | 0      | 0     | 0     | 0      |
| 40 tetra*41,71             | 0.90  | 0     | 0      | 0      | 0      | 0     | 0     | 0      | 0      | 0     | 0     | 0      |
| 56 tetra                   | 2.96  | 0     | 0      | 4.79   | 0      | 0     | 0     | 0      | 0      | 0     | 0     | 0      |
| 77 tetra                   | 0.59  | 0     | 0      | 0.91   | 0      | 0     | 0     | 0      | 0      | 0     | 0     | 0      |
| 86 penta*87,97,109,119,125 | 0     | 0.34  | 0      | 0      | 0      | 0     | 0     | 0      | 0      | 0     | 0     | 0      |
| 95 penta                   | 0.09  | 0     | 0      | 0      | 0      | 0     | 0     | 0      | 0      | 0     | 0     | 0      |
| 108 penta                  | 0.29  | 0     | 0      | 0      | 0      | 0     | 0     | 0      | 0      | 0     | 0     | 0      |
| 110 penta*115              | 0.89  | 0     | 0      | 0      | 0      | 0     | 0     | 0      | 0      | 0     | 0     | 0      |
| 114 penta                  | 0     | 0.23  | 0      | 0      | 0      | 0     | 0     | 0      | 0      | 0     | 0     | 0      |
| 118 penta                  | 0.26  | 0     | 0      | 0      | 0      | 0     | 0     | 0      | 0      | 0     | 0     | 0      |
| 123 penta                  | 0.18  | 0     | 0      | 0      | 0      | 0     | 0     | 0      | 0      | 0     | 0     | 0      |
| 129 hexa*138,163           | 0.06  | 0     | 0      | 0      | 0      | 0     | 0     | 0      | 0      | 0     | 0     | 0      |
| 132 hexa                   | 0.12  | 0     | 0      | 0      | 0      | 0     | 0     | 0      | 0      | 0     | 0     | 0      |
| 135 hexa*151               | 0.13  | 0     | 0      | 0      | 0      | 0     | 0     | 0      | 0      | 0     | 0     | 0      |
| 142 hexa                   | 0     | 1.65  | 0      | 0      | 0      | 0     | 0     | 0      | 0      | 0     | 0     | 0      |
| 146 hexa                   | 0.22  | 0     | 0      | 0      | 0      | 0     | 0     | 0      | 0      | 0     | 0     | 0      |
| 147 hexa*149               | 0.23  | 0     | 0      | 0      | 0      | 0     | 0     | 0      | 0      | 0     | 0     | 0      |

|              |      |       |     |      |     |      |   |   |   |   |   |   |
|--------------|------|-------|-----|------|-----|------|---|---|---|---|---|---|
| 153 hexa*168 | 0.24 | 0     | 0   | 0    | 0   | 0    | 0 | 0 | 0 | 0 | 0 | 0 |
| 160 hexa     | 0.25 | 1.05  | 0   | 0    | 0   | 0    | 0 | 0 | 0 | 0 | 0 | 0 |
| 206 nona     | 0    | 0.46  | 0   | 0    | 0   | 0    | 0 | 0 | 0 | 0 | 0 | 0 |
| 207 nona     | 0    | 0.31  | 0   | 0    | 0   | 0    | 0 | 0 | 0 | 0 | 0 | 0 |
| 208 nona     | 0    | 0.38  | 0   | 0    | 0   | 0    | 0 | 0 | 0 | 0 | 0 | 0 |
| 209 deca     | 0    | 59.36 | 0   | 0.46 | 0   | 0    | 0 | 0 | 0 | 0 | 0 | 0 |
| <b>SUM</b>   | 57.3 | 180.4 | 2.1 | 11.7 | 2.8 | 14.4 | 0 | 0 | 0 | 0 | 0 | 0 |

**Table S3. Detected PCB congeners (ng/g f.w.) in paint pigments purchased from Vogel**

|                            | CC   | DD   | PP    | HH   | TT    | MM | VV | FF | EE | JJ | KK |
|----------------------------|------|------|-------|------|-------|----|----|----|----|----|----|
| 1 mono                     | 0    | 2.95 | 0.52  | 0    | 0     | 0  | 0  | 0  | 0  | 0  | 0  |
| 2 mono                     | 0    | 3.26 | 0.51  | 0    | 0     | 0  | 0  | 0  | 0  | 0  | 0  |
| 3 mono                     | 0    | 2.21 | 0.24  | 0    | 0     | 0  | 0  | 0  | 0  | 0  | 0  |
| 4 di                       | 0.08 | 0    | 12.85 | 0.54 | 4.83  | 0  | 0  | 0  | 0  | 0  | 0  |
| 6 di                       | 0.04 | 0.05 | 36.88 | 0.44 | 1.10  | 0  | 0  | 0  | 0  | 0  | 0  |
| 8 di                       | 0.20 | 0.17 | 16.92 | 0.72 | 2.44  | 0  | 0  | 0  | 0  | 0  | 0  |
| 11 di                      | 0.10 | 0.08 | 10.09 | 2.38 | 11.69 | 0  | 0  | 0  | 0  | 0  | 0  |
| 12 di*13                   | 0    | 0    | 11.07 | 0    | 0     | 0  | 0  | 0  | 0  | 0  | 0  |
| 15 di                      | 0    | 0    | 2.50  | 0    | 0     | 0  | 0  | 0  | 0  | 0  | 0  |
| 18 tri*30                  | 0.14 | 0    | 0     | 0    | 0     | 0  | 0  | 0  | 0  | 0  | 0  |
| 20 tri*28                  | 0.43 | 0    | 0     | 0    | 0.40  | 0  | 0  | 0  | 0  | 0  | 0  |
| 21 tri*33                  | 0.57 | 0    | 0     | 0    | 0     | 0  | 0  | 0  | 0  | 0  | 0  |
| 31 tri                     | 0.25 | 0    | 0     | 0    | 0     | 0  | 0  | 0  | 0  | 0  | 0  |
| 52 tetra                   | 0    | 0    | 0     | 3.33 | 0     | 0  | 0  | 0  | 0  | 0  | 0  |
| 61 tetra*70,74,76          | 0.20 | 0    | 0     | 0    | 0     | 0  | 0  | 0  | 0  | 0  | 0  |
| 78 tetra                   | 0    | 0    | 0     | 0    | 0.76  | 0  | 0  | 0  | 0  | 0  | 0  |
| 86 penta*87,97,109,119,125 | 0    | 0    | 0.55  | 0    | 0     | 0  | 0  | 0  | 0  | 0  | 0  |
| 90 penta*101,113           | 0    | 0.15 | 0     | 0.92 | 0     | 0  | 0  | 0  | 0  | 0  | 0  |
| 95 penta                   | 0    | 0    | 0     | 0.57 | 0     | 0  | 0  | 0  | 0  | 0  | 0  |
| 106 penta                  | 0    | 0    | 0.55  | 0    | 0     | 0  | 0  | 0  | 0  | 0  | 0  |
| 118 penta                  | 0    | 0.26 | 0     | 0    | 0     | 0  | 0  | 0  | 0  | 0  | 0  |
| 142 hexa                   | 0    | 0    | 1.48  | 0    | 0     | 0  | 0  | 0  | 0  | 0  | 0  |
| 146 hexa                   | 0    | 2.44 | 0     | 0    | 0     | 0  | 0  | 0  | 0  | 0  | 0  |
| 147 hexa*149               | 0    | 1.58 | 0     | 0    | 0     | 0  | 0  | 0  | 0  | 0  | 0  |
| 153 hexa*168               | 0    | 0.55 | 0     | 0    | 0     | 0  | 0  | 0  | 0  | 0  | 0  |
| 160 hexa                   | 0    | 0    | 0.87  | 0    | 0     | 0  | 0  | 0  | 0  | 0  | 0  |
| 161 hexa                   | 0    | 1.79 | 0     | 0    | 0     | 0  | 0  | 0  | 0  | 0  | 0  |

|            |     |      |        |     |      |   |   |   |   |   |   |
|------------|-----|------|--------|-----|------|---|---|---|---|---|---|
| 187 hepta  | 0   | 0.25 | 0      | 0   | 0    | 0 | 0 | 0 | 0 | 0 | 0 |
| 206 nona   | 0   | 0    | 0.52   | 0   | 0    | 0 | 0 | 0 | 0 | 0 | 0 |
| 207 nona   | 0   | 0    | 0.89   | 0   | 0    | 0 | 0 | 0 | 0 | 0 | 0 |
| 208 nona   | 0   | 0    | 1.43   | 0   | 0    | 0 | 0 | 0 | 0 | 0 | 0 |
| 209 deca   | 0   | 0    | 100.47 | 0   | 0    | 0 | 0 | 0 | 0 | 0 | 0 |
| <b>SUM</b> | 2.0 | 15.7 | 198.3  | 8.9 | 21.2 | 0 | 0 | 0 | 0 | 0 | 0 |
